# Supplementary material for: Passive microrheology in the effective time domain: analyzing time dependent colloidal dispersions
Source: Royal Society of Chemistry journal article supplement (doi:10.1039/c6sm00829a), 2016-01-01
Supplement: c6sm00829a1.pdf [file c6sm00829a1.pdf]

## Supplementary Information

### Passive Microrheology in the Effective Time Domain: Analyzing Time Dependent Colloidal Dispersions

Bhavana M. Vyas,<sup>a,b</sup> Ashish V. Orpe,<sup>a\*</sup> Manish Kaushal<sup>b</sup> and Yogesh M. Joshi<sup>b\*</sup>

<sup>a</sup> Chemical Engineering Division, National Chemical, Laboratory, Pune 411 008, India.

<sup>b</sup> Department of Chemical Engineering, Indian Institute of Technology Kanpur,  
Kanpur 208016, India

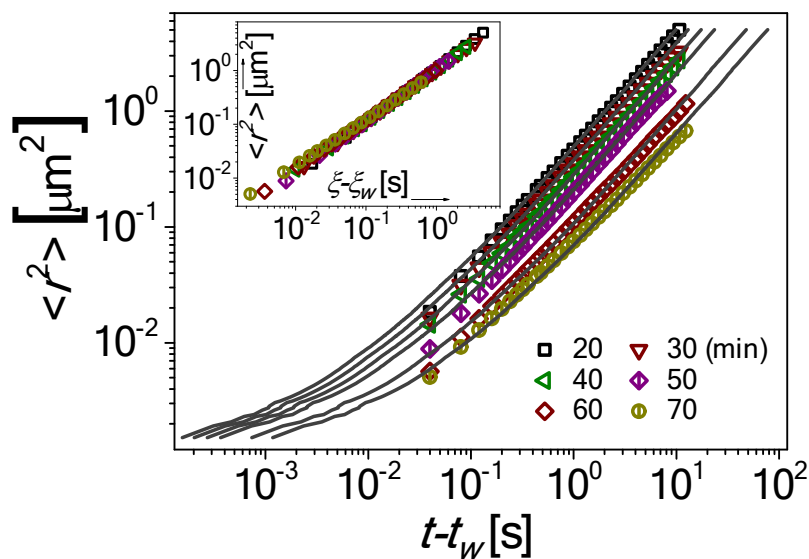

**Figure SI-1.** Mean square displacement  $\left(\left\langle (r(t-t_w))^2 \right\rangle = (k_B T / \pi a) J(t-t_w)\right)$  is plotted as a function of  $t-t_w$  for different  $t_w$  for 1.8 weight % suspension. The symbols represent the experimental data while the solid lines represent prediction using equation (10). Inset shows the transformed data (shown in main figure) in the effective time domain.

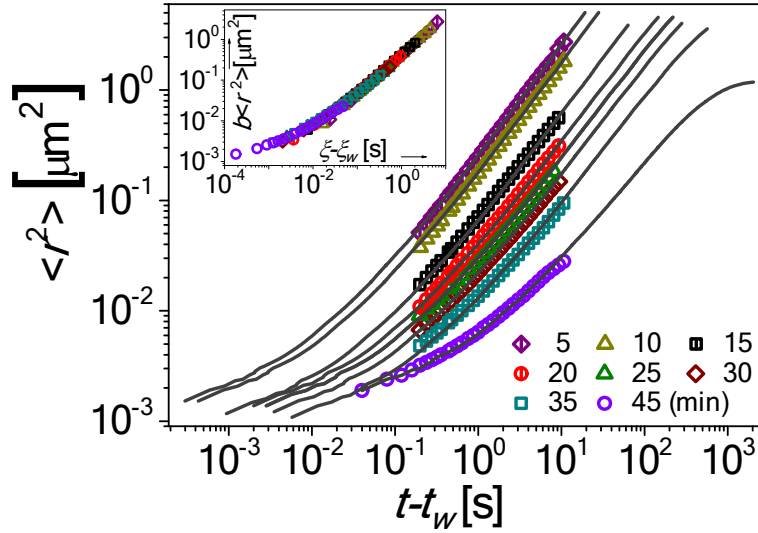

**Figure SI-2.** Mean square displacement  $\left(\langle (r(t-t_w))^2 \rangle = (k_B T / \pi a) J(t-t_w)\right)$  is plotted as a function of  $t-t_w$  for different  $t_w$  for 2.2 weight % suspension. The symbols represent the experimental data while the solid lines represent prediction using equation (10). Inset shows the transformed data (shown in main figure) in the effective time domain.

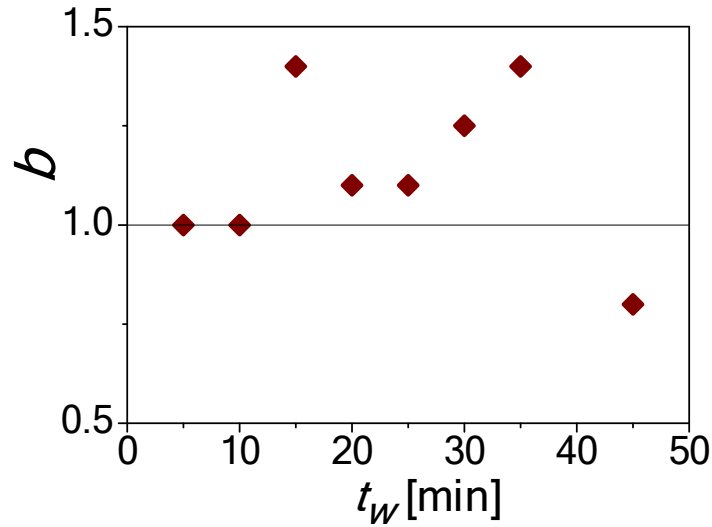

**Figure SI-3.** Vertical shift factor ( $b$ ) is plotted as a function of  $t_w$  for 2.2 weight % suspension for superposition shown in the inset of figure SI-2.
